# Supplementary material for: Proteomic Analysis on Exosomes Derived from Patients’ Sera Infected with Echinococcus granulosus
Source: PubMed Central journal article supplement — Korean J Parasitol. 2019 Oct 31;57(5):489–97. doi: 10.3347/kjp.2019.57.5.489 (PMC6851256; doi:10.3347/kjp.2019.57.5.489), 2019-10-31
Supplement: kjp-57-5-489-suppl.pdf [file kjp-57-5-489-suppl.pdf]

**Supplementary Table S1.** Human Proteins exclusively existed in exosomes derived from patients infected with *Echinococcus granulosus*

| Protein description                                           | Protein accession | Gene name | Peptides | Unique peptides |
|---------------------------------------------------------------|-------------------|-----------|----------|-----------------|
| PDZ and LIM domain protein 1                                  | O00151            | PDLIM1    | 4        | 4               |
| Actin-related protein 2/3 complex subunit 2                   | O15144            | ARPC2     | 3        | 3               |
| Caveolae-associated protein 2                                 | O95810            | CAVIN2    | 6        | 6               |
| Carbonic anhydrase 1                                          | P00915            | CA1       | 4        | 4               |
| Band 3 anion transport protein                                | P02730            | SLC4A1    | 5        | 5               |
| Lactotransferrin                                              | P02788            | LTF       | 14       | 13              |
| Glyceraldehyde-3-phosphate dehydrogenase                      | P04406            | GAPDH     | 7        | 7               |
| Integrin beta-3                                               | P05106            | TGB3      | 10       | 10              |
| Alpha-enolase                                                 | P06733            | ENO1      | 2        | 2               |
| L-lactate dehydrogenase B chain                               | P07195            | LDHB      | 5        | 4               |
| Tubulin beta chain                                            | P07437            | TUBB      | 7        | 2               |
| Integrin alpha-IIb                                            | P08514            | ITGA2B    | 14       | 14              |
| Pleckstrin                                                    | P08567            | PLEK      | 3        | 3               |
| Heat shock cognate 71KDa protein                              | P11142            | HSPA8     | 6        | 4               |
| Nidogen-1                                                     | P14543            | NID1      | 4        | 4               |
| Pyruvate kinase PKM                                           | P14618            | PKM       | 8        | 8               |
| Vinculin                                                      | P18206            | VCL       | 28       | 28              |
| Myosin regulatory light chain 12A                             | P19105            | MYL12A    | 5        | 2               |
| Filamin-A                                                     | P21333            | FLNA      | 64       | 64              |
| Cofilin-1                                                     | P23528            | CFL1      | 3        | 3               |
| Moesin                                                        | P26038            | MSN       | 2        | 2               |
| Peroxiredoxin-6                                               | P30041            | PRDX6     | 4        | 4               |
| Coronin-1A                                                    | P31146            | CORO1A    | 5        | 5               |
| Myosin-9                                                      | P35579            | MYH9      | 53       | 53              |
| Transgelin-2                                                  | P37802            | TAGLN2    | 4        | 4               |
| LIM and senescent cekl antigenlike-contaning domain protein 1 | P48059            | LIMS1     | 9        | 9               |
| Vasodilator-stimulated phosphoprotein                         | P50552            | VASP      | 4        | 4               |
| Neutrophil defensin 3                                         | P59666            | DEFA3     | 2        | 4               |
| Actin-related protein 2/3 complex subunit                     | P59998            | ARPC4     | 2        | 4               |
| Myosin light polypeptide 6                                    | P60660            | MYL6      | 6        | 6               |
| Actin-related protein 3                                       | P61158            | ACTR3     | 3        | 3               |
| Ras-related protein rap-1b                                    | P61224            | RAP1B     | 5        | 5               |
| Peptidyl-prolyl cis-trans isomerase A                         | P62937            | PPIA      | 3        | 3               |
| 14-3-3 zeta/delta                                             | P63104            | YWHAZ     | 5        | 4               |
| Actin,gamma-enteric smooth muscle                             | P63267            | ACTG2     | 6        | 1               |
| Tropomyosin alpha-4 chain                                     | P67936            | TPM4      | 11       | 6               |
| ADP-ribosylation factor 1                                     | P84077            | TPM4      | 3        | 3               |
| Adenylyl cyclase-associated                                   | Q01518            | CAP1      | 9        | 9               |
| Secreted phosphoprotein 24                                    | Q13103            | SPP2      | 2        | 2               |
| Integrin-linked protein kinase                                | Q13418            | ILK       | 10       | 10              |
| Ras suppressor protein 1                                      | Q15404            | RSU1      | 3        | 3               |
| Fermitin family homolog 3                                     | Q86UX7            | FERMT3    | 14       | 14              |
| Beta-parvin                                                   | Q9HBI1            | PARVB     | 3        | 3               |
| Coronin-1C                                                    | Q9ULV4            | COROIC    | 7        | 7               |
| Talin-1                                                       | Q9Y490            | TLN1      | 64       | 64              |
